# Supplementary material
Source: HighWire-hosted journal article supplement (https://injuryprevention.bmj.com/content/29/3/207)
Supplement: inline-supplementary-material-1 [file inline-supplementary-material-1.pdf]

## Supplemental material

### Alcohol and Cannabis Use in Traffic-Related Injuries in Mexico City

**Supplementary Table S1. Sociodemographic characteristics of study participants. Road traffic injuries from an emergency department (n=433).**

|                          | n   | %    |
|--------------------------|-----|------|
| <b>Sex</b>               |     |      |
| Female                   | 113 | 26.1 |
| Male                     | 320 | 73.9 |
| <b>Age (years)</b>       |     |      |
| 18-39                    | 338 | 78.1 |
| 40-59                    | 78  | 18   |
| 60-69                    | 17  | 3.9  |
| <b>Education (years)</b> |     |      |
| <= 9                     | 159 | 37.2 |
| 10-12                    | 181 | 42.4 |
| >=13                     | 87  | 20.4 |
| <b>Marital status</b>    |     |      |
| Single                   | 241 | 56.4 |
| Married/cohabiting       | 163 | 38.2 |
| Widowed/other            | 23  | 5.4  |
| <b>Time of injury</b>    |     |      |
| Weekday                  | 169 | 39   |
| Weeknight                | 117 | 27   |
| Weekend day              | 58  | 13.4 |
| Weekend night            | 89  | 20.6 |
| <b>RTI type</b>          |     |      |
| Driver (car/bike/other)  | 66  | 15.2 |
| Passenger                | 95  | 21.9 |
| Pedestrian               | 56  | 12.9 |
| Driver (motorcycle)      | 216 | 49.9 |
| <b>Control period 1</b>  |     |      |
| None                     | 96  | 22.2 |
| Day prior                | 231 | 53.5 |
| Two days prior           | 30  | 6.9  |
| More than two days prior | 75  | 17.4 |
| <b>Control period 2</b>  |     |      |
| None                     | 127 | 29.4 |
| Day prior                | 10  | 2.3  |
| Two days prior           | 193 | 44.7 |
| More than two days prior | 102 | 23.6 |

Notes: RTI - Road Traffic Injury

Some frequencies do not add up to the total sample size due to missing values

**Supplementary Table S2 - Matched pairs of substance use before injury with every control period and total**

|                                                 |  | <b>Control periods - Matched pairs (n)</b>                 |     |     |
|-------------------------------------------------|--|------------------------------------------------------------|-----|-----|
|                                                 |  | Yes                                                        | No  |     |
| <b>Alcohol use before injury (self-report)</b>  |  | <b>Alcohol use - Control period 1</b>                      |     |     |
| Yes                                             |  | 15                                                         | 45  |     |
| No                                              |  | 8                                                          | 264 |     |
|                                                 |  | <b>Alcohol use - Control period 2</b>                      |     |     |
| Yes                                             |  | 8                                                          | 40  |     |
| No                                              |  | 7                                                          | 248 |     |
|                                                 |  | <b>Number of matched control periods with alcohol use</b>  |     |     |
| <b>Multiple matching</b>                        |  | None                                                       | One | Two |
| Yes                                             |  | 34                                                         | 10  | 4   |
| No                                              |  | 240                                                        | 15  | 0   |
| <b>Cannabis use before injury (self-report)</b> |  | <b>Cannabis use - Control period 1</b>                     |     |     |
| Yes                                             |  | 10                                                         | 13  |     |
| No                                              |  | 10                                                         | 296 |     |
|                                                 |  | <b>Cannabis use - Control period 2</b>                     |     |     |
| Yes                                             |  | 11                                                         | 8   |     |
| No                                              |  | 10                                                         | 273 |     |
|                                                 |  | <b>Number of matched control periods with cannabis use</b> |     |     |
| <b>Multiple matching estimate</b>               |  | None                                                       | One | Two |
| Yes                                             |  | 8                                                          | 3   | 8   |
| No                                              |  | 267                                                        | 8   | 6   |

Supplementary Table S3 - Concordance of biological and self-report measures

| Alcohol use before injury (self-report)  | Alcohol use (BAC)         |       |          |       | Agreement |       |         |
|------------------------------------------|---------------------------|-------|----------|-------|-----------|-------|---------|
|                                          | Positive                  | Row % | Negative | Row % | %         | Kappa | p-value |
| Yes                                      | 54                        | 72.97 | 20       | 27.03 | 91.24%    | 0.734 | < 0.001 |
| Col %                                    | 85.71                     |       | 7.46     |       |           |       |         |
| No                                       | 9                         | 3.5   | 248      | 96.5  |           |       |         |
| Col %                                    | 14.29                     |       | 92.54    |       |           |       |         |
| Cannabis use before injury (self-report) | Cannabis use (oral fluid) |       |          |       | 89.42%    | 0.210 | < 0.001 |
|                                          | Positive                  | Row % | Negative | Row % |           |       |         |
| Yes                                      | 6                         | 25    | 18       | 75    |           |       |         |
| Col %                                    | 28.57                     |       | 6.19     |       |           |       |         |
| No                                       | 15                        | 5.21  | 273      | 94.79 |           |       |         |
| Col %                                    | 71.43                     |       | 93.81    |       |           |       |         |
